# Supplementary material for: Non-proteolytic ubiquitin modification of PPARγ by Smurf1 protects the liver from steatosis
Source: PubMed Central journal article supplement (PMC6317813; doi:10.1371/journal.pbio.3000091), 2018-12-19
Supplement: pbio.3000091.s006.pdf [file pbio.3000091.s006.pdf]

**S1 Table: Age, sex and steatosis of mice used in different experiments**

|                      | Spontaneous hepatosteatois |             |           |             |          |
|----------------------|----------------------------|-------------|-----------|-------------|----------|
|                      | BL-WT                      | BL-SF1KO    | BL-SF2KO  | B6-WT       | B6-SF1KO |
| Number of mice       |                            |             |           |             |          |
| Male; female         | 7; 8                       | 7; 8        | 7; 8      | 5; 5        | 5; 5     |
| Age (month)          |                            |             |           |             |          |
| Range                | 9-12                       | 9-12        | 9-12      | 11-12       | 11-12    |
| Liver Steatosis*     | 2/15                       | 12/15       | 3/15      | 0/10        | 0/10     |
| Liver Inflammation** | 0/15                       | 0/15        | 0/15      | 0/10        | 0/10     |
|                      | GTT and ITT                |             |           |             |          |
|                      | BL-WT                      | BL-SF1KO    |           |             |          |
| Number of mice       |                            |             |           |             |          |
| Male                 | 8 + 8                      | 8 + 8       |           |             |          |
| Age (month)          |                            |             |           |             |          |
| Range                | 9-12 (n=8)                 | 9-12 (n=8)  |           |             |          |
| Range                | 4.5-5 (n=8)                | 4.5-5 (n=8) |           |             |          |
|                      | HFD treatment (BL-mice)    |             |           |             |          |
|                      | WT(ND)                     | SF1KO(ND)   | WT(HFD)   | SF1KO(HFD)  |          |
| Number of mice       |                            |             |           |             |          |
| Male                 | 7                          | 7           | 8         | 8           |          |
| Age (month)          |                            |             |           |             |          |
| Range (starting)     | 2.5-3                      | 2.5-3       | 2.5-3     | 2.5-3       |          |
| Range (end)          | 4.5-5                      | 4.5-5       | 4.5-5     | 4.5-5       |          |
| Liver Steatosis*     | 0/7                        | 0/7         | 5/7       | 6/7         |          |
| Inflammation**       | 0/7                        | 0/7         | 0/8       | 0/8         |          |
|                      | HFD treatment (B6-mice)    |             |           |             |          |
|                      | WT(ND)                     | SF1KO(ND)   | WT(HFD)   | SF1KO(HFD)  |          |
| Number of mice       |                            |             |           |             |          |
| Male                 | 8                          | 7           | 8         | 7           |          |
| Age (month)          |                            |             |           |             |          |
| Range (starting)     | 2.5-3                      | 2.5-3       | 2.5-3     | 2.5-3       |          |
| Range (end)          | 4.5-5                      | 4.5-5       | 4.5-5     | 4.5-5       |          |
| Liver Steatosis*     | 0/8                        | 0/7         | 5/7       | 7/7         |          |
|                      | GW9662 treatment (BL-mice) |             |           |             |          |
|                      | WT(GW)                     | SF1KO (GW)  | WT (Ctrl) | SF1KO(Ctrl) |          |
| Number of mice       |                            |             |           |             |          |
| Male                 | 8                          | 8           | 8         | 8           |          |
| Age (month)          |                            |             |           |             |          |
| Range (starting)     | 7-9                        | 7-9         | 7-9       | 7-9         |          |
| Range (end)          | 9-12                       | 9-12        | 9-12      | 9-12        |          |
| Liver Steatosis*     | 0/8                        | 0/8         | 0/8       | 7/8         |          |

Steatosis: NO: < 10% steatosis, score 0 or 1; Yes: >10% steatosis, score 2, 3, 4.

Inflammation: NO: score 0 or 1; Yes, score 2, 3, 4.
