# Supplementary material for: Non-proteolytic ubiquitin modification of PPARγ by Smurf1 protects the liver from steatosis
Source: PubMed Central journal article supplement (PMC6317813; doi:10.1371/journal.pbio.3000091), 2018-12-19
Supplement: pbio.3000091.s007.pdf [file pbio.3000091.s007.pdf]

**S2 Table, related to Figure 2:****Tissue weights, food consumption and blood parameters in mice fed with HFD**

|                             | BL          |              | B6          |              |
|-----------------------------|-------------|--------------|-------------|--------------|
|                             | WT (n=8)    | SF1KO (n=8)  | WT (n=8)    | SF1KO (n=7)  |
| Body weight, g              | 26.73±2.43  | 31.76±2.80** | 34.93±2.47  | 32.48±3.40   |
| Food consumption, g/d       | 2.40±0.17   | 2.51±0.11    | 2.91±0.2    | 2.79±0.15    |
| Fat mass, g                 | 3.90±1.03   | 7.13±2.02**  | 9.28±1.11   | 10.29±2.57   |
| Lean mass, g                | 21.57±1.91  | 23.03±1.45   | 24.77±1.03  | 21.60±1.16** |
| Fat mass/Lean mass, %       | 18.15±4.75  | 30.92±8.33** | 37.44±4.18  | 47.32±10.21* |
| Liver weight, g             | 1.06±0.15   | 1.40±0.39*   | 1.30±0.18   | 1.36±0.20    |
| Liver weight/Body weight, % | 3.96±0.44   | 4.37±0.97    | 3.75±0.63   | 4.19±0.55    |
| Serum FFA, $\mu$ mol/dL     | 28.42±15.65 | 44.41±10.62* | 28.71±6.36  | 23.59±1.74   |
| Serum TG, mg/dL             | 146.2±30.9  | 161.9±34.1   | 106.4±22.0  | 136.5±31.1*  |
| Serum Chloesterol, mg/dL    | 192.7±17.2  | 193.9±26.1   | 142.1±42.8  | 175.1±17.2   |
| AST, U/L                    | 155.1±102.4 | 158.9±94.6   | 211.8±113.4 | 237.4±114.7  |
| ALT, U/L                    | 43.5±13.9   | 65.9±18.3**  | 96.1±66.2   | 95.1±37.0    |
| Albumin, g/dL               | 2.9±0.2     | 2.7±0.2*     | 3.0±0.4     | 3.5±0.4*     |

Data represents mean  $\pm$  SD, \*  $p < 0.05$ , \*\* $p < 0.02$  compared with WT.
