# Supplementary material for: Non-proteolytic ubiquitin modification of PPARγ by Smurf1 protects the liver from steatosis
Source: PubMed Central journal article supplement (PMC6317813; doi:10.1371/journal.pbio.3000091), 2018-12-19
Supplement: pbio.3000091.s009.pdf [file pbio.3000091.s009.pdf]

**S4 Table: Primer sequences.**

| Name                | Sequence                             | Application |
|---------------------|--------------------------------------|-------------|
| Pparg $\Delta$ PY-F | AAAGTAGAACCTGCATCTTCTGAAAAGACCCAGCTC | Mutagenesis |
| Pparg $\Delta$ PY-R | GAGCTGGGTCTTTTCAGAAGATGCAGGTTCTACTTT |             |
| Pparg1-F            | AAGAAGCGGTGAACCACTGA                 | RT-qPCR     |
| Pparg1-R            | GAATGCGAGTGGTCTTCCAT                 |             |
| Pparg2-F            | TCGCTGATGCACTGCCTATG                 |             |
| Pparg2-R            | GAGAGGTCCACAGAGCTGATT                |             |
| Pparg-F             | CTCCAAGAATACCAAAGTGCGA               |             |
| Pparg-R             | GCCTGATGCTTTATCCCCACA                |             |
| Ppara-F             | TACTGCCGTTTTTACAAGTGC                |             |
| Ppara-R             | AGGTCGTGTTTACAGGTAAGA                |             |
| Ppard-F             | TCCATCGTCAACAAAGACGGG                |             |
| Ppard-R             | ACTTGGGCTCAATGATGTCAC                |             |
| Rxra-F              | ATGGACACCAAACATTTCTCTGC              |             |
| Rxra-R              | CCAGTGGAGAGCCGATTCC                  |             |
| Rxb-F               | CCACCTCTTACCCCTTCAGC                 |             |
| Rxb-R               | TGGAAGAAGTATGACTGGGA                 |             |
| Cebpd-F             | CGACTTCAGCGCCTACATTGA                |             |
| Cebpd-R             | CTAGCGACAGACCCACAC                   |             |
| Cebpa-F             | GCGGGAACGCAACAACATC                  |             |
| Cebpa-R             | GTCACTGGTCAACTCCAGCAC                |             |
| Cebpb-F             | CAAGCTGAGCGACGAGTACA                 |             |
| Cebpb-R             | AGCTGCTCCACCTTCTTCTG                 |             |
| Acacb-F             | CGCTCACCAACAGTAAGGTGG                |             |
| Acacb-R             | GCTTGGCAGGGAGTTCCTC                  |             |
| Cpt1a-F             | CTCCGCCTGAGCCATGAAG                  |             |
| Cpt1a-R             | CACCAGTGATGATGCCATTCT                |             |
| Cyp4a12b-F          | GGGGAGATCAGACCCAAAAGC                |             |
| Cyp4a12b-R          | ATTCGTCGGTGCTGAAACCAT                |             |
| Cyp8b1-F            | CTAGGGCCTAAAGGTTTCGAGT               |             |
| Cyp8b1-R            | GTAGCCGAATAAGCTCAGGAAG               |             |
| Elovl6-F            | GAAAAGCAGTTCAACGAGAACG               |             |
| Elovl6-R            | AGATGCCGACCACAAAGATA                 |             |
| Fads2-F             | GATGGCTGCAACATGACTATGG               |             |
| Fads2-R             | GCTGAGGCACCCTTTAAGTGG                |             |
| Scd1-F              | TTCTTGCGATACTCTGGTGC                 |             |
| Scd1-R              | CGGGATTGAATGTTCTTGTCGT               |             |
| Apoa2-F             | TGGTCGCACTGCTGGTAAC                  |             |
| Apoa2-R             | TTTGCCATATTCAGTCATGCTCT              |             |
| Apoc3-F             | TACAGGGCTACATGGAACAAGC               |             |
| Apoc3-R             | CAGGGATCTGAAGTGATTGTCC               |             |
| Fabp1-F             | ATGAACTTCTCCGGCAAGTACC               |             |
| Fabp1-R             | CTGACACCCCCTTGATGTCC                 |             |

|                 |                         |           |
|-----------------|-------------------------|-----------|
| Cd36-F          | ATGGGCTGTGATCGGAACTG    |           |
| Cd36-R          | TTTGCCACGTCATCTGGGTTT   |           |
| Tnfa-F          | CCCTCACACTCAGATCATCTTCT |           |
| Tnfa-R          | GCTACGACGTGGGCTACAG     |           |
| F4/80 (Adgre)-F | ACCAATATCCTGGGGAGAGC    |           |
| F4/80 (Adgre)-R | TAGGGCAGATCCCAATTGTC    |           |
| Smurf1-F        | AGCATCAAGATCCGTCTGACA   |           |
| Smurf1-R        | CCAGAGCCGTCCACAACAAT    |           |
| Smurf2-F        | AAACAGTTGCTTGGGAAGTCA   |           |
| Smurf2-R        | TGCTCAACACAGAAGGTATGGT  |           |
| Pparg1-pro-F    | ACGCGGAAGAAGAGACCTG     | ChIP-qPCR |
| Pparg1-pro-R    | CAGAGTGTGACTTCTCCTCAGC  |           |
| Pparg2-pro-F    | CTCCTGTTGACCCAGAGCAT    |           |
| Pparg2-pro-R    | AACATGCAATTTACCCACA     |           |
| Fabp1-pro-F     | TCGTTGACCATTGCTCTCAG    |           |
| Fabp1-pro-R     | GCTTCCTTTCCACAGCTGAC    |           |
